# Supplementary material for: The rare-earth derivant of mixed-polyoxoniobate clusters with high proton release capacity
Source: Royal Society of Chemistry journal article supplement (doi:10.1039/d2qi01953a), 2022-01-01
Supplement: d2qi01953a1.pdf [file d2qi01953a1.pdf]

## Supplementary Information

# The rare-earth derivant of mixed-polyoxoniobates clusters with high proton release capacity†

Haiying Wang,<sup>‡a</sup> Xiaohan Xu,<sup>‡b</sup> Qianqian Shang,<sup>a</sup> Kexing Xiao,<sup>b</sup> Jiahui Chen,<sup>b</sup> Yuqing Yang,<sup>b</sup>  
Ehsan Raei,<sup>b</sup> Dongdi Zhang,<sup>\*a</sup> Jingyang Niu<sup>\*a</sup> and Tianbo Liu<sup>\*b</sup>

<sup>a</sup>Henan Key Laboratory of Polyoxometalate Chemistry, College of Chemistry and Chemical Engineering, Henan University, Kaifeng 475004, P. R. China

<sup>b</sup>Department of Polymer Science, The University of Akron, Akron, Ohio 44325, United States

## EXPERIMENTAL SECTION

**Materials.**  $K_7[HNb_6O_{19}] \cdot 13H_2O$  and  $K_{12}[H_2P_2W_{12}O_{48}] \cdot 24H_2O$  were prepared according to the literature procedure.<sup>S1-2</sup> Purity was confirmed by IR spectroscopy. All reagents and solvents were of commercially available grade and used without any previous purification

Synthesis of  $K_{12}(NH_4)_{10}[\{Nb_{12}P_4W_{24}O_{122}\}_2\{Ln(H_2O)_5\}_4\{Nb_4O_4(OH)_6\}] \cdot xH_2O$  (Ln = Sm, Eu, Tb, Dy, Er, Tm and Yb for 1-7).

**Synthesis of 1:**  $K_7[HNb_6O_{19}] \cdot 13H_2O$  (2.0 g, 1.46 mmol) was dissolved in a solution consisting of 13.5 mL of 30% aqueous  $H_2O_2$  and 165 mL of water with moderate stirring. Next, 1 M HCl (13 mL) was added dropwise and  $K_{12}[H_2P_2W_{12}O_{48}] \cdot 24H_2O$  (5.75 g, 1.46 mmol) was then added immediately under rapidly stirring. Stirring of the resulting solution was continued for approximately 15 mins (pH is ca. 2.0 at this point). Then, about 1 hour later, an aqueous solution of  $SmCl_3 \cdot 6H_2O$  (5.33 g, 14.6 mmol) was added by dropwise. The mixture was adjusted to pH 2.2~2.4. The resultant solution was refluxed to colorless and then cooled to room temperature. Ammonium chloride ( $NH_4Cl$ , 1.56 g, 29.2 mmol) was added to the filtrate, which was stirred for another hour. And, the result solution was heated at 60 °C for 0.5 hour in an open beaker and then cooled to room temperature, filtered. Crystals obtained within one week (yield based on tungsten: 2.8 g, 41%). IR (KBr pellet,  $cm^{-1}$ ):  $\nu = 3453(s), 3205(s), 2048(m), 1617(m), 1425(m), 1088(s), 1071(s), 1010(w), 959(s), 903(s), 781(s), 694(w), 520(w)$ . CHN analysis calculated: H 1.37, N 0.74; found for H 1.48, N 0.73. ICP-MS analysis show an elemental molar ratio of 3:2:12:7:1 for K:P:W:Nb:Sm.

**Synthesis of 2:** The synthetic method is the same as above except employing  $EuCl_3 \cdot 6H_2O$  (5.35 g, 14.6 mmol) instead of  $SmCl_3 \cdot 6H_2O$  (5.33g, 14.6 mmol). Yield (based on tungsten): 3.5 g, 52%. IR (KBr pellet,  $cm^{-1}$ ):  $\nu = 3455(s), 3203(s), 2049(m), 1615(m), 1422(m), 1089(s), 1070(s), 1008(w), 958(s), 903(s), 782(s), 692(w), 518(w)$ . CHN analysis calculated: H 1.17, N 0.76; found for H 1.21, N 0.79. ICP-MS analysis show an elemental molar ratio of 3:2:12:7:1 for K:P:W:Nb:Eu.

**Synthesis of 3:** The synthetic method is the same as above except employing  $TbCl_3 \cdot 6H_2O$  (5.45 g, 14.6 mmol) instead of  $SmCl_3 \cdot 6H_2O$  (5.33g, 14.6 mmol) . Yield (based on tungsten): 3.2 g, 46%. IR (KBr pellet,  $cm^{-1}$ ):  $\nu = 3451(s), 3206(s), 2048(m), 1615(m), 1428(m), 1086(s), 1070(s), 1012(w), 957(s), 901(s), 783(s), 695(w), 521(w)$ . CHN analysis calculated: H 1.36, N 0.74; found for H 1.47, N 0.73. ICP-MS analysis show an elemental molar ratio of 3:2:12:7:1 for K:P:W:Nb:Tb.

**Synthesis of 4:** The synthetic method is the same as above except employing  $DyCl_3 \cdot 6H_2O$  (5.50 g, 14.6 mmol) instead of  $SmCl_3 \cdot 6H_2O$  (5.33g, 14.6 mmol) . Yield (based on tungsten): 3.1 g, 45%. IR (KBr pellet,  $cm^{-1}$ ):  $\nu = 3452(s), 3202(s), 2048(m), 1615(m), 1424(m), 1087(s), 1075(s), 1012(w), 957(s), 902(s), 784(s), 695(w), 522(w)$ . CHN analysis calculated: H 1.36, N 0.74; found for H 1.43, N 0.77. ICP-MS analysis show an elemental molar ratio of 3:2:12:7:1 for K:P:W:Nb:Dy.

**Synthesis of 5:** The synthetic method is the same as above except employing  $ErCl_3 \cdot 6H_2O$  (5.57 g, 14.6 mmol) instead of  $SmCl_3 \cdot 6H_2O$  (5.33g, 14.6 mmol) . Yield (based on tungsten): 3.4 g, 49%. IR (KBr pellet,  $cm^{-1}$ ):  $\nu = 3451(s), 3204(s), 2045(m), 1617(m), 1426(m), 1086(s), 1074(s), 1008(w), 957(s), 901(s), 779(s), 692(w), 520(w)$ . CHN analysis calculated: H 1.36, N 0.74; found for H 1.44, N 0.79. ICP-MS analysis show an elemental molar ratio of 3:2:12:7:1 for K:P:W:Nb:Er.

**Synthesis of 6:** The synthetic method is the same as above except employing  $TmCl_3 \cdot 6H_2O$  (5.59 g, 14.6 mmol) instead of  $SmCl_3 \cdot 6H_2O$  (5.33g, 14.6 mmol) . Yield (based on tungsten): 3.3 g, 48%. IR (KBr pellet,  $cm^{-1}$ ):  $\nu = 3454(s), 3206(s), 2047(m), 1616(m), 1427(m), 1085(s), 1071(s), 1012(w), 958(s), 905(s), 780(s), 694(w), 522(w)$ . CHN analysis calculated: H 1.36, N 0.74; found for H 1.43, N 0.76. ICP-MS analysis show an elemental molar ratio of 3:2:12:7:1 for K:P:W:Nb:Tm.

**Synthesis of 7:** The synthetic method is the same as above except employing  $\text{YbCl}_3 \cdot 6\text{H}_2\text{O}$  (5.66 g, 14.6 mmol) instead of  $\text{SmCl}_3 \cdot 6\text{H}_2\text{O}$  (5.33 g, 14.6 mmol). Yield (based on tungsten): 2.9 g, 42%. IR (KBr pellet,  $\text{cm}^{-1}$ ):  $\nu = 3454(\text{s}), 3204(\text{s}), 2049(\text{m}), 1616(\text{m}), 1425(\text{m}), 1086(\text{s}), 1071(\text{s}), 1010(\text{w}), 958(\text{s}), 903(\text{s}), 782(\text{s}), 696(\text{w}), 520(\text{w})$ . CHN analysis calculated: H 1.36, N 0.74; found for H 1.43, N 0.75. ICP-MS analysis show an elemental molar ratio of 3:2:12:7:1 for K:P:W:Nb:Yb.

**Instrumentation.** IR spectra were recorded on a Bruker VERTEX 70 IR spectrometer spectrometer in the  $4000\text{--}400\text{ cm}^{-1}$  range using crystalline sample in KBr pellet. The elemental analysis was carried out on an Agilent Technologies 700 Series ICP-OES in Akron. C, H and N elemental analysis were carried out on a VarioElcube CHNS S3 analyzer. TGA analyses were carried out on a TGA/DSC3+ analyzer under  $\text{N}_2$  atmosphere with  $10\text{ }^\circ\text{C}\cdot\text{min}^{-1}$  heating rate. Electrospray ionization mass spectrometry were performed on an AB SCIEX Triple TOF 4600 instrument at Declustering Potential of -10 V, Collision Energy of -5 V and flow rate of  $20\text{ }\mu\text{L}/\text{min}$ , the solutions of the investigated systems were prepared in water (1 mg/mL).

The SevenExcellence<sup>TM</sup> bench meter was applied for measuring pH values. 4063 Traceable Portable Conductivity Meter was applied for conductivity measurements. Solution preparation and pH measurements were conducted in the glovebox of the  $\text{N}_2$  environment at room temperature. All deionized water used in experiments was boiled to get rid of  $\text{CO}_2$  dissolved. pH values and conductivities of the 1mg/mL aqueous solution of  $\{\text{Ln}_4\text{Nb}_{28}\}$  clusters were measured to give the original state of clusters before introducing KOH. For each type of  $\{\text{Ln}_4\text{Nb}_{28}\}$  cluster, two groups of aqueous solutions were prepared and used for pH measurements: a group of 1mg/mL clusters solution containing a monotonically increasing amount of KOH, i.e., 10, 20, ... up to 100 equivalents, with the volume of each solution of 2 mL; a control group of deionized water containing the same amount of KOH, with the volume of each solution of 2 mL.

X-ray Crystallography. Suitable single crystal for **1-7** were selected and placed in a thin glass tube due to efflorescence. Single-crystal X-ray diffraction data were recorded on a Bruker Apex-II CCD diffractometer at 296(2) K with monochromated Mo-K $\alpha$  radiation ( $\lambda = 0.71073\text{ \AA}$ ). The structures were solved by direct methods, and non-H atoms were refined anisotropically by a least-squares method on  $F^2$  using the *OLEX2* program.<sup>S3</sup> Selected details of the data collection and structural refinement of compounds **1-7** can be found in Tab. S1 and full details are available in the corresponding CIF file, which was deposited at [http://www.ccdc.cam.ac.uk/data\\_request/cif](http://www.ccdc.cam.ac.uk/data_request/cif) with the CCDC numbers 2194738-2194744. Because of disorder, these guest water molecules were removed using SQUEEZE.<sup>S4</sup> The molecular formula finally determined according to the charge balance, ICP-OES, CHN elemental analysis and TGA.

S1 M. Filowitz, R. K. C. Ho, W. G. Klemperer and W. Shum, Oxygen-17 nuclear magnetic resonance spectroscopy of polyoxometalates. 1. Sensitivity and resolution, *Inorg. Chem.*, 1979, **18**, 93–103.

S2 R. Contant, Potassium Octadecatungstodiphosphates(V) and Related Lacunary Compounds, *Inorg. Synth.*, 1990, **27**, 104–111.

S3 O. V. Dolomanov, L. J. Bourhis, R. J. Gildea, J. A. K. Howard and H. Puschmann, *OLEX2*: a complete structure solution, refinement and analysis program, *J. Appl. Crystallogr.*, 2009, **42**, 339–341.

S4 A. L. Spek, *PLATON/SQUEEZE*: a tool for the calculation of the disordered solvent contribution to the calculated structure factors, *Acta Crystallogr., Sect. C: Struct. Chem.*, 2015, **71**, 9–18.

Tab. S1 Crystal Data and Structure Refinement of 1-7.

| Identification code                                          | 1                                                                                                 | 2                                                                                               | 3                                                                                                 |
|--------------------------------------------------------------|---------------------------------------------------------------------------------------------------|-------------------------------------------------------------------------------------------------|---------------------------------------------------------------------------------------------------|
| Empirical formula                                            | Sm <sub>4</sub> K <sub>8</sub> Nb <sub>29.6</sub> O <sub>290</sub> P <sub>8</sub> W <sub>48</sub> | Eu <sub>4</sub> K <sub>8</sub> Nb <sub>28</sub> O <sub>290</sub> P <sub>8</sub> W <sub>48</sub> | Tb <sub>4</sub> K <sub>8</sub> Nb <sub>29.6</sub> O <sub>290</sub> P <sub>8</sub> W <sub>48</sub> |
| Formula weight                                               | 17376.90                                                                                          | 17234.68                                                                                        | 17411.18                                                                                          |
| Temperature/K                                                | 296.15                                                                                            | 296.15                                                                                          | 296.15                                                                                            |
| Crystal system                                               | orthorhombic                                                                                      | orthorhombic                                                                                    | orthorhombic                                                                                      |
| Space group                                                  | <i>Fddd</i>                                                                                       | <i>Fddd</i>                                                                                     | <i>Fddd</i>                                                                                       |
| <i>a</i> /Å                                                  | 24.297(9)                                                                                         | 24.2194(19)                                                                                     | 24.1165(17)                                                                                       |
| <i>b</i> /Å                                                  | 44.446(16)                                                                                        | 44.094(3)                                                                                       | 43.830(3)                                                                                         |
| <i>c</i> /Å                                                  | 70.43(2)                                                                                          | 70.448(6)                                                                                       | 70.337(5)                                                                                         |
| Volume/Å <sup>3</sup>                                        | 76056(45)                                                                                         | 75233(10)                                                                                       | 74349(9)                                                                                          |
| <i>Z</i>                                                     | 8                                                                                                 | 8                                                                                               | 8                                                                                                 |
| $\rho_{\text{calc}}$ /g/cm <sup>3</sup>                      | 3.035                                                                                             | 3.043                                                                                           | 3.111                                                                                             |
| $\mu$ /mm <sup>-1</sup>                                      | 16.118                                                                                            | 16.290                                                                                          | 16.617                                                                                            |
| <i>F</i> (000)                                               | 60845.0                                                                                           | 60352.0                                                                                         | 60941.0                                                                                           |
| Crystal size/mm <sup>3</sup>                                 | 0.4 × 0.31 × 0.3                                                                                  | 0.33 × 0.19 × 0.16                                                                              | 0.53 × 0.36 × 0.19                                                                                |
| Radiation                                                    | MoK $\alpha$ ( $\lambda$ = 0.71073)                                                               | MoK $\alpha$ ( $\lambda$ = 0.71073)                                                             | MoK $\alpha$ ( $\lambda$ = 0.71073)                                                               |
| 2 $\Theta$ range for data collection/ $^{\circ}$             | 3.466 to 50                                                                                       | 3.292 to 50                                                                                     | 3.856 to 50                                                                                       |
| Index ranges                                                 | -24 ≤ <i>h</i> ≤ 28,<br>-52 ≤ <i>k</i> ≤ 52,<br>-71 ≤ <i>l</i> ≤ 83                               | -28 ≤ <i>h</i> ≤ 28,<br>-38 ≤ <i>k</i> ≤ 52,<br>-83 ≤ <i>l</i> ≤ 83                             | -28 ≤ <i>h</i> ≤ 28,<br>-51 ≤ <i>k</i> ≤ 51,<br>-58 ≤ <i>l</i> ≤ 83                               |
| Reflections collected                                        | 95932                                                                                             | 95831                                                                                           | 94077                                                                                             |
| Independent reflections                                      | 16699<br>[ <i>R</i> <sub>int</sub> = 0.1336, <i>R</i> <sub>sigma</sub> = 0.0977]                  | 16548<br>[ <i>R</i> <sub>int</sub> = 0.0982, <i>R</i> <sub>sigma</sub> = 0.0708]                | 16267<br>[ <i>R</i> <sub>int</sub> = 0.1014, <i>R</i> <sub>sigma</sub> = 0.0733]                  |
| Data/restraints/parameters                                   | 16699/24/848                                                                                      | 16548/1109/891                                                                                  | 16267/593/900                                                                                     |
| Goodness-of-fit on <i>F</i> <sup>2</sup>                     | 0.965                                                                                             | 0.991                                                                                           | 0.980                                                                                             |
| Final <i>R</i> indexes [ <i>I</i> ≥ 2 $\sigma$ ( <i>I</i> )] | <i>R</i> <sub>1</sub> = 0.0535, <i>wR</i> <sub>2</sub> = 0.1229                                   | <i>R</i> <sub>1</sub> = 0.0475, <i>wR</i> <sub>2</sub> = 0.1167                                 | <i>R</i> <sub>1</sub> = 0.0456, <i>wR</i> <sub>2</sub> = 0.1050                                   |
| Final <i>R</i> indexes [all data]                            | <i>R</i> <sub>1</sub> = 0.1143, <i>wR</i> <sub>2</sub> = 0.1375                                   | <i>R</i> <sub>1</sub> = 0.0946, <i>wR</i> <sub>2</sub> = 0.1274                                 | <i>R</i> <sub>1</sub> = 0.0859, <i>wR</i> <sub>2</sub> = 0.1135                                   |
| Largest diff. peak/hole / e Å <sup>-3</sup>                  | 3.88/-1.93                                                                                        | 3.32/-2.81                                                                                      | 2.62/-2.47                                                                                        |

| Identification code                                           | 4                                                                                               | 5                                                                                                 | 6                                                                                                 | 7                                                                                                 |
|---------------------------------------------------------------|-------------------------------------------------------------------------------------------------|---------------------------------------------------------------------------------------------------|---------------------------------------------------------------------------------------------------|---------------------------------------------------------------------------------------------------|
| Empirical formula                                             | Dy <sub>4</sub> K <sub>8</sub> Nb <sub>28</sub> O <sub>290</sub> P <sub>8</sub> W <sub>48</sub> | Er <sub>4</sub> K <sub>8</sub> Nb <sub>29.6</sub> O <sub>290</sub> P <sub>8</sub> W <sub>48</sub> | Tm <sub>4</sub> K <sub>8</sub> Nb <sub>29.6</sub> O <sub>290</sub> P <sub>8</sub> W <sub>48</sub> | Yb <sub>4</sub> K <sub>8</sub> Nb <sub>29.6</sub> O <sub>290</sub> P <sub>8</sub> W <sub>48</sub> |
| Formula weight                                                | 17276.84                                                                                        | 17444.54                                                                                          | 17451.22                                                                                          | 17467.66                                                                                          |
| Temperature/K                                                 | 296.15                                                                                          | 296.15                                                                                            | 296.15                                                                                            | 296.15                                                                                            |
| Crystal system                                                | orthorhombic                                                                                    | orthorhombic                                                                                      | orthorhombic                                                                                      | orthorhombic                                                                                      |
| Space group                                                   | <i>Fddd</i>                                                                                     | <i>Fddd</i>                                                                                       | <i>Fddd</i>                                                                                       | <i>Fddd</i>                                                                                       |
| <i>a</i> /Å                                                   | 24.118(3)                                                                                       | 23.722(5)                                                                                         | 24.099(4)                                                                                         | 23.878(8)                                                                                         |
| <i>b</i> /Å                                                   | 43.890(5)                                                                                       | 43.245(8)                                                                                         | 43.796(7)                                                                                         | 43.595(14)                                                                                        |
| <i>c</i> /Å                                                   | 70.370(9)                                                                                       | 69.648(13)                                                                                        | 70.296(10)                                                                                        | 69.78(2)                                                                                          |
| Volume/Å <sup>3</sup>                                         | 74488(16)                                                                                       | 71450(24)                                                                                         | 74193(19)                                                                                         | 72635(41)                                                                                         |
| <i>Z</i>                                                      | 8                                                                                               | 8                                                                                                 | 8                                                                                                 | 8                                                                                                 |
| $\rho_{\text{calc}}$ /g/cm <sup>3</sup>                       | 3.081                                                                                           | 3.243                                                                                             | 3.125                                                                                             | 3.195                                                                                             |
| $\mu$ /mm <sup>-1</sup>                                       | 16.582                                                                                          | 17.439                                                                                            | 16.846                                                                                            | 17.260                                                                                            |
| <i>F</i> (000)                                                | 60448.0                                                                                         | 61037.0                                                                                           | 61069.0                                                                                           | 61101.0                                                                                           |
| Crystal size/mm <sup>3</sup>                                  | 0.34 × 0.19 × 0.16                                                                              | 0.33 × 0.19 × 0.16                                                                                | 0.38 × 0.31 × 0.25                                                                                | 0.23 × 0.17 × 0.15                                                                                |
| Radiation                                                     | MoK $\alpha$ ( $\lambda$ = 0.71073)                                                             | MoK $\alpha$ ( $\lambda$ = 0.71073)                                                               | MoK $\alpha$ ( $\lambda$ = 0.71073)                                                               | MoK $\alpha$ ( $\lambda$ = 0.71073)                                                               |
| 2 $\theta$ range for data collection/ $^{\circ}$              | 3.308 to 50                                                                                     | 3.358 to 50                                                                                       | 3.312 to 50                                                                                       | 3.332 to 50                                                                                       |
| Index ranges                                                  | -28 ≤ <i>h</i> ≤ 20,<br>-50 ≤ <i>k</i> ≤ 52,<br>-83 ≤ <i>l</i> ≤ 73                             | -28 ≤ <i>h</i> ≤ 27,<br>-51 ≤ <i>k</i> ≤ 46,<br>-82 ≤ <i>l</i> ≤ 64                               | -28 ≤ <i>h</i> ≤ 24,<br>-44 ≤ <i>k</i> ≤ 52,<br>-83 ≤ <i>l</i> ≤ 75                               | -28 ≤ <i>h</i> ≤ 19,<br>-31 ≤ <i>k</i> ≤ 51,<br>-82 ≤ <i>l</i> ≤ 82                               |
| Reflections collected                                         | 95274                                                                                           | 73554                                                                                             | 94119                                                                                             | 74800                                                                                             |
| Independent reflections                                       | 16391<br>[ <i>R</i> <sub>int</sub> = 0.1201, <i>R</i> <sub>sigma</sub> = 0.0854]                | 15700<br>[ <i>R</i> <sub>int</sub> = 0.1623, <i>R</i> <sub>sigma</sub> = 0.1169]                  | 16293<br>[ <i>R</i> <sub>int</sub> = 0.1246, <i>R</i> <sub>sigma</sub> = 0.0913]                  | 15939<br>[ <i>R</i> <sub>int</sub> = 0.1381, <i>R</i> <sub>sigma</sub> = 0.1211]                  |
| Data/restraints/parameters                                    | 16391/62/891                                                                                    | 15700/663/900                                                                                     | 16293/622/901                                                                                     | 15939/98/900                                                                                      |
| Goodness-of-fit on <i>F</i> <sup>2</sup>                      | 0.956                                                                                           | 1.011                                                                                             | 1.018                                                                                             | 0.963                                                                                             |
| Final <i>R</i> indexes [ <i>I</i> >= 2 $\sigma$ ( <i>I</i> )] | <i>R</i> <sub><i>I</i></sub> = 0.0510, <i>wR</i> <sub>2</sub> = 0.1212                          | <i>R</i> <sub><i>I</i></sub> = 0.0660, <i>wR</i> <sub>2</sub> = 0.1537                            | <i>R</i> <sub><i>I</i></sub> = 0.0572, <i>wR</i> <sub>2</sub> = 0.1349                            | <i>R</i> <sub><i>I</i></sub> = 0.0575, <i>wR</i> <sub>2</sub> = 0.1230                            |
| Final <i>R</i> indexes [all data]                             | <i>R</i> <sub><i>I</i></sub> = 0.1050, <i>wR</i> <sub>2</sub> = 0.1339                          | <i>R</i> <sub><i>I</i></sub> = 0.1182, <i>wR</i> <sub>2</sub> = 0.1690                            | <i>R</i> <sub><i>I</i></sub> = 0.1145, <i>wR</i> <sub>2</sub> = 0.1493                            | <i>R</i> <sub><i>I</i></sub> = 0.1086, <i>wR</i> <sub>2</sub> = 0.1358                            |
| Largest diff. peak/hole / e Å <sup>-3</sup>                   | 4.33/-1.81                                                                                      | 3.40/-3.53                                                                                        | 2.78/-3.66                                                                                        | 3.37/-3.51                                                                                        |

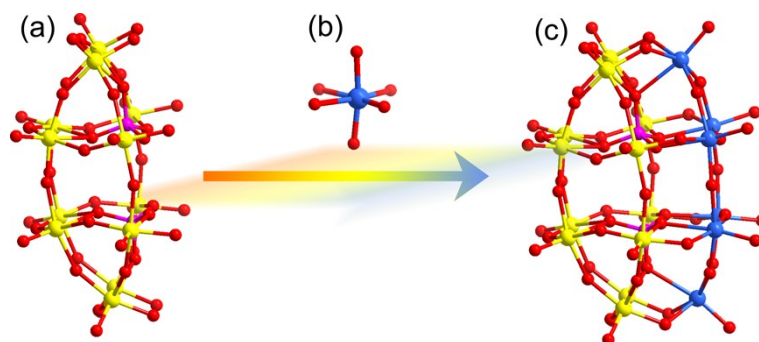

Fig. S1. The evolution from  $[\text{P}_2\text{W}_{12}\text{O}_{48}]^{14-}$  to  $[\text{Nb}_6\text{P}_2\text{W}_{12}\text{O}_{62}]^{12-}$ . The ball-and-stick representation of  $[\text{P}_2\text{W}_{12}\text{O}_{48}]^{14-}$  (a),  $\text{NbO}_6$  (b) and  $[\text{Nb}_6\text{P}_2\text{W}_{12}\text{O}_{62}]^{12-}$  (c). Color codes: W, yellow; Nb, blue; P, purple; O, red.

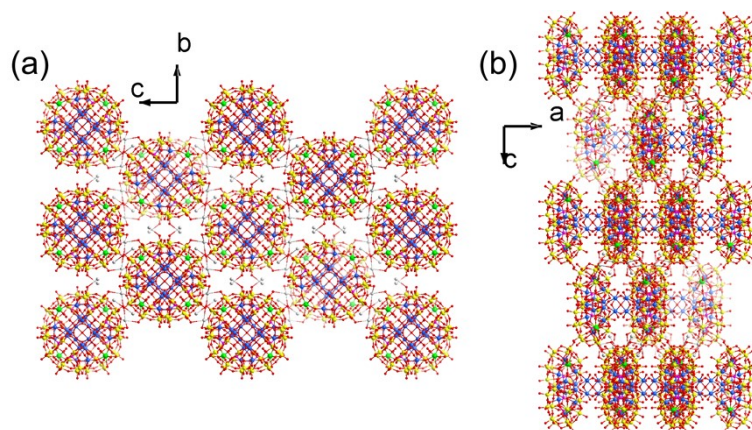

Fig. S2. The purely inorganic three-dimensional metal frame of **1-7**. Color codes: W, yellow; Nb, blue; P, purple; Ln, green; O, red; K, light grey.

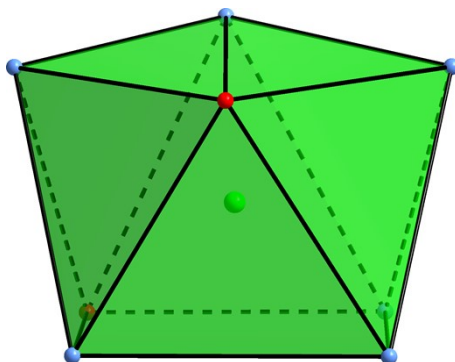

Fig. S3. The two-capped triangular prism geometry of  $\text{LnO}_8$  polyhedral. Color codes: Ln, green; O of Nb-O-Ln, red; O of  $\text{OH}_2$ , light blue.

Tab. S2 Ln-O bond lengths in **1-7**.

| Bond    | Length    | Bond    | Length    | Bond    | Length    | Bond           | Length    |
|---------|-----------|---------|-----------|---------|-----------|----------------|-----------|
| Sm1-O57 | 2.3198(6) | Eu1-O57 | 2.3282(2) | Tb1-O57 | 2.2802(1) | Dy1-O57        | 2.2824(2) |
| Sm1-O49 | 2.3284(7) | Eu1-O49 | 2.3383(1) | Tb1-O49 | 2.2932(1) | Dy1-O49        | 2.2819(2) |
| Sm1-O4W | 2.3489(7) | Eu1-O4W | 2.3087(2) | Tb1-O4W | 2.3922(1) | Dy1-O4W        | 2.3543(3) |
| Sm1-O3W | 2.4276(8) | Eu1-O3W | 2.3940(2) | Tb1-O3W | 2.4160(2) | Dy1-O3W        | 2.4059(3) |
| Sm1-O6W | 2.4849(7) | Eu1-O1W | 2.5151(1) | Tb1-O5W | 2.4397(1) | Dy1-O6W        | 2.4266(2) |
| Sm1-O2W | 2.5182(5) | Eu1-O6W | 2.5239(2) | Tb1-O6W | 2.4456(1) | Dy1-O5W        | 2.4506(2) |
| Sm1-O1W | 2.5225(6) | Eu1-O2W | 2.5319(1) | Tb1-O1W | 2.4572(1) | Dy1-O1W        | 2.4516(2) |
| Sm1-O5W | 2.6288(6) | Eu1-O5W | 2.5444(1) | Tb1-O2W | 2.5020(1) | Dy1-O2W        | 2.4736(2) |
| Bond    | Length    | Bond    | Length    | Bond    | Length    | Average Length |           |
| Er1-O57 | 2.2529(4) | Tm1-O57 | 2.2834(3) | Yb1-O57 | 2.2102(6) | <b>1</b> (Sm)  | 2.4474    |
| Er1-O49 | 2.2550(4) | Tm1-O49 | 2.2380(3) | Yb1-O49 | 2.2135(6) | <b>2</b> (Eu)  | 2.4356    |
| Er1-O3W | 2.2549(4) | Tm1-O3W | 2.3275(4) | Yb1-O6W | 2.3073(7) | <b>3</b> (Tb)  | 2.4033    |
| Er1-O4W | 2.2681(4) | Tm1-O4W | 2.3502(3) | Yb1-O3W | 2.3109(7) | <b>4</b> (Dy)  | 2.3909    |
| Er1-O1W | 2.3758(3) | Tm1-O6W | 2.3813(3) | Yb1-O5W | 2.3167(6) | <b>5</b> (Er)  | 2.3297    |
| Er1-O2W | 2.3859(3) | Tm1-O1W | 2.4187(2) | Yb1-O4W | 2.3239(7) | <b>6</b> (Tm)  | 2.3597    |
| Er1-O5W | 2.4197(3) | Tm1-O5W | 2.4284(3) | Yb1-O1W | 2.3702(5) | <b>7</b> (Yb)  | 2.3073    |
| Er1-O6W | 2.4255(4) | Tm1-O2W | 2.4500(2) | Yb1-O2W | 2.4053(5) |                |           |

Tab. S3 BVS calculation results of all the atoms in **1-7**.

| Atom Code  | Bond Valence | Atom Code | Bond Valence | Atom Code | Bond Valence | Atom Code | Bond Valence | Atom Code | Bond Valence | Atom Code | Bond Valence |
|------------|--------------|-----------|--------------|-----------|--------------|-----------|--------------|-----------|--------------|-----------|--------------|
| <b>Sm1</b> | 2.99         | W8        | 6.32         | Nb3       | 4.87         | O9        | 1.96         | O33       | 1.95         | O57       | 1.88         |
| W1         | 6.17         | W9        | 6.16         | Nb4       | 4.88         | O10       | 1.88         | O34       | 2.01         | O58       | 1.72         |
| W2         | 6.23         | W10       | 6.14         | Nb5       | 5.13         | O11       | 1.52         | O35       | 1.86         | O59       | 2.03         |
| W3         | 5.90         | W11       | 6.13         | Nb6       | 4.85         | O12       | 2.06         | O36       | 1.71         | O60       | 1.87         |
| W4         | 5.94         | W12       | 5.99         | Nb7       | 4.93         | O13       | 2.05         | O37       | 2.13         | O61       | 1.91         |
| W5         | 6.04         | Nb1       | 4.82         | P1        | 4.66         | O14       | 1.90         | O38       | 2.02         | O62       | 1.89         |
| W6         | 6.39         | Nb2       | 4.95         | P2        | 4.79         | O15       | 1.83         | O39       | 1.73         | O63       | 1.88         |
| W7         | 5.99         |           |              |           |              | O16       | 1.61         | O40       | 1.94         | O64       | 1.22         |
| O1         | 1.84         | O25       | 1.82         | O49       | 1.89         | O17       | 2.13         | O41       | 2.12         | O65       | 0.93         |
| O2         | 1.90         | O26       | 2.09         | O50       | 1.79         | O18       | 2.02         | O42       | 1.77         | O1W       | 0.31         |
| O3         | 1.94         | O27       | 1.65         | O51       | 1.71         | O19       | 1.93         | O43       | 1.58         | O2W       | 0.29         |
| O4         | 1.98         | O28       | 2.08         | O52       | 2.05         | O20       | 1.73         | O44       | 1.88         | O3W       | 0.36         |
| O5         | 1.82         | O29       | 1.92         | O53       | 1.87         | O21       | 1.61         | O45       | 1.91         | O4W       | 0.46         |
| O6         | 1.81         | O30       | 1.88         | O54       | 2.06         | O22       | 2.04         | O46       | 1.86         | O5W       | 0.21         |
| O7         | 1.86         | O31       | 1.81         | O55       | 1.77         | O23       | 1.84         | O47       | 1.72         | O6W       | 0.26         |
| O8         | 1.94         | O32       | 1.82         | O56       | 2.02         | O24       | 2.06         | O48       | 1.85         |           |              |
| Atom Code  | Bond Valence | Atom Code | Bond Valence | Atom Code | Bond Valence | Atom Code | Bond Valence | Atom Code | Bond Valence | Atom Code | Bond Valence |
| <b>Eu1</b> | 2.60         | W8        | 6.17         | Nb3       | 4.96         | O9        | 2.04         | O33       | 2.00         | O57       | 1.92         |
| W1         | 6.17         | W9        | 6.09         | Nb4       | 5.04         | O10       | 1.91         | O34       | 2.06         | O58       | 1.69         |
| W2         | 6.24         | W10       | 6.15         | Nb5       | 5.15         | O11       | 1.71         | O35       | 1.82         | O59       | 2.08         |
| W3         | 6.26         | W11       | 6.23         | Nb6       | 4.94         | O12       | 2.12         | O36       | 1.65         | O60       | 1.91         |
| W4         | 6.10         | W12       | 6.20         | Nb7       | 4.92         | O13       | 2.08         | O37       | 2.12         | O61       | 2.00         |
| W5         | 6.16         | Nb1       | 5.13         | P1        | 4.77         | O14       | 2.00         | O38       | 2.02         | O62       | 1.98         |

|             |                |             |                |             |                |             |                |             |                |             |                |
|-------------|----------------|-------------|----------------|-------------|----------------|-------------|----------------|-------------|----------------|-------------|----------------|
| W6          | 6.31           | Nb2         | 5.10           | P2          | 4.75           | O15         | 1.86           | O39         | 1.73           | O63         | 1.93           |
| W7          | 6.28           |             |                |             |                | O16         | 1.66           | O40         | 1.97           | O64         | 1.44           |
| O1          | 1.80           | O25         | 1.71           | O49         | 1.89           | O17         | 2.13           | O41         | 2.03           | O65         | 0.79           |
| O2          | 1.89           | O26         | 2.13           | O50         | 1.79           | O18         | 2.04           | O42         | 1.82           | O1W         | 0.31           |
| O3          | 1.97           | O27         | 1.75           | O51         | 1.69           | O19         | 2.03           | O43         | 1.82           | O2W         | 0.24           |
| O4          | 2.00           | O28         | 2.11           | O52         | 2.09           | O20         | 1.77           | O44         | 1.88           | O3W         | 0.35           |
| O5          | 1.95           | O29         | 1.97           | O53         | 1.89           | O21         | 1.61           | O45         | 1.82           | O4W         | 0.44           |
| O6          | 1.90           | O30         | 1.91           | O54         | 2.07           | O22         | 2.00           | O46         | 1.87           | O5W         | 0.23           |
| O7          | 1.87           | O31         | 1.83           | O55         | 1.78           | O23         | 1.81           | O47         | 1.83           | O6W         | 0.18           |
| O8          | 1.97           | O32         | 1.76           | O56         | 2.09           | O24         | 2.06           | O48         | 1.80           |             |                |
| <b>Atom</b> | <b>Bond</b>    |
| <b>Code</b> | <b>Valence</b> |
| <b>Tb1</b>  | 3.04           | W8          | 6.42           | Nb3         | 5.09           | O9          | 2.06           | O33         | 2.06           | O57         | 1.95           |
| W1          | 6.24           | W9          | 6.44           | Nb4         | 5.02           | O10         | 1.92           | O34         | 2.06           | O58         | 1.72           |
| W2          | 6.34           | W10         | 6.22           | Nb5         | 5.23           | O11         | 1.84           | O35         | 1.76           | O59         | 2.10           |
| W3          | 6.41           | W11         | 6.43           | Nb6         | 5.20           | O12         | 2.19           | O36         | 1.84           | O60         | 1.99           |
| W4          | 6.39           | W12         | 6.26           | Nb7         | 5.00           | O13         | 2.13           | O37         | 2.15           | O61         | 2.05           |
| W5          | 6.39           | Nb1         | 5.09           | P1          | 4.72           | O14         | 1.98           | O38         | 2.06           | O62         | 1.96           |
| W6          | 6.36           | Nb2         | 5.13           | P2          | 4.67           | O15         | 1.92           | O39         | 1.73           | O63         | 2.00           |
| W7          | 6.19           |             |                |             |                | O16         | 1.82           | O40         | 2.02           | O64         | 1.26           |
| O1          | 1.75           | O25         | 1.72           | O49         | 2.03           | O17         | 2.18           | O41         | 2.05           | O65         | 0.82           |
| O2          | 1.91           | O26         | 2.14           | O50         | 1.84           | O18         | 2.09           | O42         | 1.86           | O1W         | 0.35           |
| O3          | 1.98           | O27         | 1.84           | O51         | 1.68           | O19         | 2.04           | O43         | 1.77           | O2W         | 0.30           |
| O4          | 2.07           | O28         | 2.16           | O52         | 2.09           | O20         | 1.79           | O44         | 1.94           | O3W         | 0.34           |
| O5          | 1.86           | O29         | 1.99           | O53         | 1.92           | O21         | 1.79           | O45         | 1.95           | O4W         | 0.38           |
| O6          | 1.87           | O30         | 1.93           | O54         | 2.11           | O22         | 2.06           | O46         | 1.91           | O5W         | 0.26           |
| O7          | 1.90           | O31         | 1.84           | O55         | 1.87           | O23         | 1.86           | O47         | 1.84           | O6W         | 0.32           |
| O8          | 2.02           | O32         | 1.82           | O56         | 2.13           | O24         | 2.10           | O48         | 1.83           |             |                |
| <b>Atom</b> | <b>Bond</b>    |
| <b>Code</b> | <b>Valence</b> |
| <b>Dy1</b>  | 3.00           | W8          | 6.35           | Nb3         | 4.95           | O9          | 2.05           | O33         | 2.03           | O57         | 2.00           |
| W1          | 6.45           | W9          | 6.43           | Nb4         | 5.15           | O10         | 1.94           | O34         | 2.06           | O58         | 1.71           |
| W2          | 6.24           | W10         | 6.21           | Nb5         | 5.19           | O11         | 1.68           | O35         | 1.80           | O59         | 2.11           |
| W3          | 6.38           | W11         | 6.31           | Nb6         | 4.99           | O12         | 2.19           | O36         | 1.74           | O60         | 1.96           |
| W4          | 6.21           | W12         | 6.19           | Nb7         | 5.01           | O13         | 2.11           | O37         | 2.18           | O61         | 2.04           |
| W5          | 6.25           | Nb1         | 5.12           | P1          | 4.78           | O14         | 1.93           | O38         | 2.04           | O62         | 1.99           |
| W6          | 6.52           | Nb2         | 5.18           | P2          | 4.70           | O15         | 1.87           | O39         | 1.78           | O63         | 1.91           |
| W7          | 6.25           |             |                |             |                | O16         | 1.69           | O40         | 2.02           | O64         | 1.31           |
| O1          | 1.93           | O25         | 1.77           | O49         | 1.94           | O17         | 2.18           | O41         | 2.07           | O65         | 0.85           |
| O2          | 1.96           | O26         | 2.17           | O50         | 1.88           | O18         | 2.08           | O42         | 1.84           | O1W         | 0.36           |
| O3          | 1.97           | O27         | 1.72           | O51         | 1.68           | O19         | 2.00           | O43         | 1.76           | O2W         | 0.28           |
| O4          | 2.03           | O28         | 2.16           | O52         | 2.10           | O20         | 1.79           | O44         | 1.89           | O3W         | 0.36           |
| O5          | 2.01           | O29         | 2.02           | O53         | 1.92           | O21         | 1.62           | O45         | 1.95           | O4W         | 0.38           |
| O6          | 1.89           | O30         | 1.93           | O54         | 2.11           | O22         | 2.09           | O46         | 1.90           | O5W         | 0.32           |
| O7          | 1.89           | O31         | 1.86           | O55         | 1.84           | O23         | 1.88           | O47         | 1.69           | O6W         | 0.26           |
| O8          | 1.99           | O32         | 1.82           | O56         | 2.07           | O24         | 2.12           | O48         | 2.12           |             |                |
| <b>Atom</b> | <b>Bond</b>    |
| <b>Code</b> | <b>Valence</b> |
| <b>Er1</b>  | 3.22           | W8          | 6.42           | Nb3         | 5.24           | O9          | 2.09           | O33         | 2.07           | O57         | 2.08           |



|             |                |             |                |             |                |             |                |             |                |             |                |
|-------------|----------------|-------------|----------------|-------------|----------------|-------------|----------------|-------------|----------------|-------------|----------------|
| W1          | 6.02           | W9          | 6.25           | Nb4         | 5.38           | O10         | 2.09           | O34         | 2.07           | O58         | 1.76           |
| W2          | 6.47           | W10         | 6.52           | Nb5         | 5.34           | O11         | 1.94           | O35         | 1.97           | O59         | 2.18           |
| W3          | 6.64           | W11         | 6.34           | Nb6         | 5.33           | O12         | 2.18           | O36         | 1.73           | O60         | 2.01           |
| W4          | 6.3            | W12         | 6.3            | Nb7         | 5.3            | O13         | 2.11           | O37         | 2.19           | O61         | 2.12           |
| W5          | 6.44           | Nb1         | 5.42           | P1          | 4.81           | O14         | 2.06           | O38         | 2.07           | O62         | 2.11           |
| W6          | 6.65           | Nb2         | 4.95           | P2          | 4.89           | O15         | 1.86           | O39         | 1.89           | O63         | 1.99           |
| W7          | 6.66           |             |                |             |                | O16         | 1.72           | O40         | 2.06           | O64         | 1.35           |
| O1          | 1.64           | O25         | 1.89           | O49         | 2.08           | O17         | 2.21           | O41         | 2.12           | O65         | 0.9            |
| O2          | 2.03           | O26         | 2.19           | O50         | 1.91           | O18         | 2.09           | O42         | 1.81           | O1W         | 0.35           |
| O3          | 2.02           | O27         | 1.96           | O51         | 1.74           | O19         | 2.17           | O43         | 1.86           | O2W         | 0.34           |
| O4          | 2.06           | O28         | 2.23           | O52         | 2.16           | O20         | 1.85           | O44         | 1.98           | O3W         | 0.44           |
| O5          | 1.9            | O29         | 1.98           | O53         | 1.95           | O21         | 1.71           | O45         | 1.88           | O4W         | 0.49           |
| O6          | 1.92           | O30         | 2.02           | O54         | 2.16           | O22         | 2.06           | O46         | 1.94           | O5W         | 0.36           |
| O7          | 1.77           | O31         | 1.89           | O55         | 1.88           | O23         | 1.92           | O47         | 1.81           | O6W         | 0.25           |
| O8          | 2.03           | O32         | 1.7            | O56         | 2.19           | O24         | 2.16           | O48         | 1.89           |             |                |
| <b>Atom</b> | <b>Bond</b>    |
| <b>Code</b> | <b>Valence</b> |
| <b>Tm1</b>  | 2.96           | W8          | 6.35           | Nb3         | 4.97           | O9          | 2.04           | O33         | 2.04           | O57         | 2.05           |
| W1          | 6.23           | W9          | 6.36           | Nb4         | 5.29           | O10         | 2.00           | O34         | 2.07           | O58         | 1.77           |
| W2          | 6.32           | W10         | 6.12           | Nb5         | 5.22           | O11         | 1.74           | O35         | 1.82           | O59         | 2.12           |
| W3          | 6.22           | W11         | 6.23           | Nb6         | 5.02           | O12         | 2.18           | O36         | 1.78           | O60         | 1.96           |
| W4          | 6.48           | W12         | 6.41           | Nb7         | 5.31           | O13         | 2.12           | O37         | 2.11           | O61         | 2.02           |
| W5          | 6.31           | Nb1         | 5.26           | P1          | 4.67           | O14         | 2.00           | O38         | 2.03           | O62         | 1.96           |
| W6          | 6.47           | Nb2         | 5.05           | P2          | 4.78           | O15         | 1.90           | O39         | 1.67           | O63         | 1.95           |
| W7          | 6.11           |             |                |             |                | O16         | 1.73           | O40         | 1.98           | O64         | 1.31           |
| O1          | 1.76           | O25         | 1.80           | O49         | 2.05           | O17         | 2.19           | O41         | 2.06           | O65         | 0.85           |
| O2          | 1.91           | O26         | 2.10           | O50         | 1.87           | O18         | 2.09           | O42         | 1.77           | O1W         | 0.33           |
| O3          | 2.00           | O27         | 1.74           | O51         | 1.81           | O19         | 2.11           | O43         | 1.68           | O2W         | 0.26           |
| O4          | 2.08           | O28         | 2.13           | O52         | 2.09           | O20         | 1.76           | O44         | 1.97           | O3W         | 0.30           |
| O5          | 1.89           | O29         | 2.00           | O53         | 1.87           | O21         | 1.71           | O45         | 2.02           | O4W         | 0.46           |
| O6          | 1.84           | O30         | 1.97           | O54         | 2.09           | O22         | 2.00           | O46         | 1.91           | O5W         | 0.40           |
| O7          | 1.69           | O31         | 1.94           | O55         | 1.89           | O23         | 1.89           | O47         | 1.82           | O6W         | 0.28           |
| O8          | 2.00           | O32         | 1.85           | O56         | 2.10           | O24         | 2.06           | O48         | 1.91           |             |                |
| <b>Atom</b> | <b>Bond</b>    |
| <b>Code</b> | <b>Valence</b> |
| <b>Yb1</b>  | 3.30           | W8          | 6.56           | Nb3         | 5.26           | O9          | 2.06           | O33         | 2.08           | O57         | 1.91           |
| W1          | 6.62           | W9          | 6.48           | Nb4         | 5.21           | O10         | 1.93           | O34         | 2.17           | O58         | 1.86           |
| W2          | 6.29           | W10         | 6.52           | Nb5         | 5.46           | O11         | 1.70           | O35         | 1.86           | O59         | 2.16           |
| W3          | 6.23           | W11         | 6.43           | Nb6         | 5.20           | O12         | 2.24           | O36         | 1.85           | O60         | 2.02           |
| W4          | 6.51           | W12         | 6.28           | Nb7         | 5.54           | O13         | 2.16           | O37         | 2.17           | O61         | 2.07           |
| W5          | 6.35           | Nb1         | 5.27           | P1          | 4.84           | O14         | 1.95           | O38         | 2.13           | O62         | 2.07           |
| W6          | 6.60           | Nb2         | 5.33           | P2          | 4.85           | O15         | 3.30           | O39         | 1.86           | O63         | 2.03           |
| W7          | 6.41           |             |                |             |                | O16         | 1.77           | O40         | 2.08           | O64         | 1.14           |
| O1          | 1.90           | O25         | 1.71           | O49         | 2.01           | O17         | 2.21           | O41         | 2.09           | O65         | 1.26           |
| O2          | 2.02           | O26         | 2.19           | O50         | 1.91           | O18         | 2.13           | O42         | 1.86           | O1W         | 0.40           |
| O3          | 2.10           | O27         | 1.86           | O51         | 1.91           | O19         | 2.12           | O43         | 6.16           | O2W         | 0.35           |
| O4          | 2.12           | O28         | 2.24           | O52         | 2.14           | O20         | 1.86           | O44         | 2.00           | O3W         | 0.37           |
| O5          | 1.93           | O29         | 2.01           | O53         | 1.98           | O21         | 1.84           | O45         | 2.01           | O4W         | 0.33           |
| O6          | 1.99           | O30         | 1.99           | O54         | 2.17           | O22         | 2.17           | O46         | 1.99           | O5W         | 0.38           |

|    |      |     |      |     |      |     |      |     |      |     |      |
|----|------|-----|------|-----|------|-----|------|-----|------|-----|------|
| O7 | 1.89 | O31 | 1.92 | O55 | 1.87 | O23 | 1.93 | O47 | 1.70 | O6W | 0.40 |
| O8 | 2.04 | O32 | 1.69 | O56 | 2.17 | O24 | 2.14 | O48 | 1.89 |     |      |

Tab. S4 pH and conductivity measurements of 1mg/mL aqueous solution of {Ln<sub>4</sub>Nb<sub>28</sub>}.

| POM                                           | Sm    | Eu    | Tb    | Dy   | Er    | Tm   | Yb    |
|-----------------------------------------------|-------|-------|-------|------|-------|------|-------|
| pH                                            | 5.774 | 5.741 | 5.447 | 5.81 | 5.728 | 5.95 | 5.624 |
| Conductivity (μS/cm)                          | 83.2  | 71.9  | 89.2  | 87.0 | 89.3  | 84.5 | 85.9  |
| Number of counterions dissociated per cluster | 22.6  | 19.5  | 24.8  | 23.6 | 24.3  | 23.0 | 23.3  |

Number of counterions dissociated per cluster is calculated based on pH and conductivities. NH<sub>4</sub><sup>+</sup> and K<sup>+</sup> have comparable molar conductivity.

Tab. S5 Number of protons neutralizing KOH during the titration.

| Molar ratio<br>KOH:POM | Degree of<br>hydrolysis | Number of H <sup>+</sup><br>contributed by<br>NH <sub>4</sub> <sup>+</sup> per<br>{Sm <sub>4</sub> Nb <sub>28</sub> }<br>cluster | Total number of<br>H <sup>+</sup> released per<br>{Sm <sub>4</sub> Nb <sub>28</sub> }<br>cluster | Number of H <sup>+</sup><br>contributed by<br>the anion part<br>per {Sm <sub>4</sub> Nb <sub>28</sub> }<br>cluster |
|------------------------|-------------------------|----------------------------------------------------------------------------------------------------------------------------------|--------------------------------------------------------------------------------------------------|--------------------------------------------------------------------------------------------------------------------|
| 0                      | 0                       | 0                                                                                                                                | 0                                                                                                | 0                                                                                                                  |
| 10                     | 0.8                     | 7.6                                                                                                                              | 8.5                                                                                              | 0.9                                                                                                                |
| 20                     | 1.0                     | 9.8                                                                                                                              | 15.8                                                                                             | 6.0                                                                                                                |
| 30                     | 1.0                     | 10.0                                                                                                                             | 21.8                                                                                             | 11.8                                                                                                               |
| 40                     | 1.0                     | 10.0                                                                                                                             | 28.1                                                                                             | 18.1                                                                                                               |

#### Example calculation of pK<sub>a</sub> of {Sm<sub>4</sub>Nb<sub>28</sub>} cluster with 20 equiv. of KOH:

Concentration of cluster solution [cluster] = 1mg/mL = 5.6 \* 10<sup>-5</sup> M

pH = 9.088 (Tab. S7)

Deprotonation efficiency ≈ 0.5 (after the subtraction of contribution by ammonium)

Each cluster with 20 coordinated water ligands is considered as 20 monoprotic acids (HA). Thus, the original concentration of HA can be calculated. [HA]<sub>original</sub> = [cluster] \* 20 = 1.1 \* 10<sup>-3</sup> M

The concentrations of HA and A<sup>-</sup> can be calculated based on the deprotonation efficiency.

$$[HA] = 1.1 * 10^{-3} \text{ M} * (1 - 0.6) = 4.4 * 10^{-2} \text{ M}$$

$$[A^-] = 1.1 * 10^{-3} \text{ M} * 0.6 = 6.6 * 10^{-2} \text{ M}$$

There are three reactions in the solution:

1. OH<sup>-</sup><sub>(aq)</sub> + HA<sub>(aq)</sub> ⇌ H<sub>2</sub>O<sub>(l)</sub> + A<sup>-</sup><sub>(aq)</sub>
2. HA<sub>(aq)</sub> ⇌ H<sup>+</sup><sub>(aq)</sub> + A<sup>-</sup><sub>(aq)</sub>
3. H<sup>+</sup><sub>(aq)</sub> + OH<sup>-</sup><sub>(aq)</sub> ⇌ H<sub>2</sub>O<sub>(l)</sub>

$$K_{a1} = \frac{[A^-]}{[HA][OH^-]} = 9.6 * 10^4$$

$$K_{a2} = \frac{K_{a1}}{K_{a3}} = 1.0 * 10^9$$

$$pK_{a2} = 9.0$$

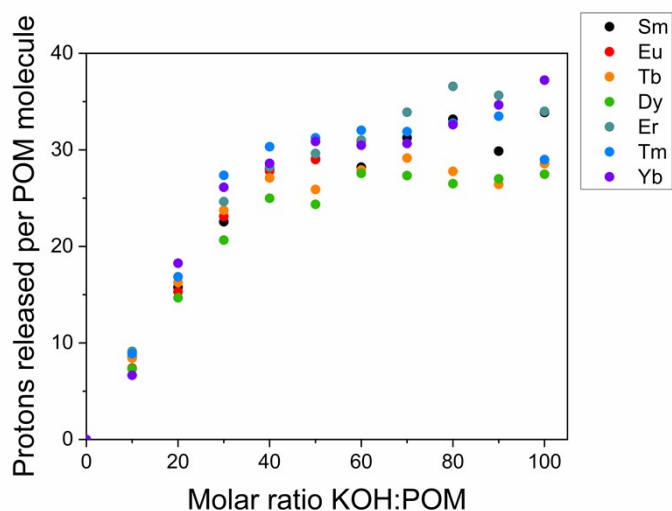

Fig. S4. The number of protons released per molecular cluster versus the molar ratio of KOH introduced to POM clusters.

Tab. S6 pH measurements of 1mg/mL aqueous solution (2 mL) of  $\{\text{Sm}_4\text{Nb}_{28}\}$  and water (2 mL) containing the same amount of KOH.

| Molar ratio<br>KOH: $\{\text{Sm}_4\text{Nb}_{28}\}$ | pH of POM solution<br>containing KOH | pH of water<br>containing KOH | Number of protons<br>released per cluster |
|-----------------------------------------------------|--------------------------------------|-------------------------------|-------------------------------------------|
| 10                                                  | 8.387                                | 10.731                        | 8.5                                       |
| 20                                                  | 9.088                                | 11.005                        | 15.8                                      |
| 30                                                  | 9.752                                | 11.159                        | 21.8                                      |
| 40                                                  | 10.484                               | 11.323                        | 28.1                                      |
| 50                                                  | 10.790                               | 11.401                        | 29.1                                      |
| 60                                                  | 11.058                               | 11.480                        | 28.2                                      |
| 70                                                  | 11.175                               | 11.561                        | 31.3                                      |
| 80                                                  | 11.292                               | 11.575                        | 33.2                                      |
| 90                                                  | 11.382                               | 11.652                        | 29.9                                      |
| 100                                                 | 11.449                               | 11.709                        | 33.9                                      |

Tab. S7 pH measurements of 1mg/mL aqueous solution (2 mL) of  $\{\text{Eu}_4\text{Nb}_{28}\}$  and water (2 mL) containing the same amount of KOH.

| Molar ratio<br>KOH: $\{\text{Eu}_4\text{Nb}_{28}\}$ | pH of POM solution<br>containing KOH | pH of water<br>containing KOH | Number of protons<br>released per cluster |
|-----------------------------------------------------|--------------------------------------|-------------------------------|-------------------------------------------|
| 10                                                  | 8.625                                | 10.781                        | 7.4                                       |
| 20                                                  | 9.263                                | 11.100                        | 15.3                                      |
| 30                                                  | 9.874                                | 11.289                        | 23.1                                      |
| 40                                                  | 10.547                               | 11.415                        | 27.8                                      |
| 50                                                  | 10.921                               | 11.502                        | 29.0                                      |
| 60                                                  | 11.127                               | 11.584                        | 30.9                                      |

Tab. S8 pH measurements of 1mg/mL aqueous solution (2 mL) of  $\{\text{Tb}_4\text{Nb}_{28}\}$  and water (2 mL) containing the same amount of KOH.

| Molar ratio<br>KOH: $\{\text{Tb}_4\text{Nb}_{28}\}$ | pH of POM solution<br>containing KOH | pH of water<br>containing KOH | Number of protons<br>released per cluster |
|-----------------------------------------------------|--------------------------------------|-------------------------------|-------------------------------------------|
| 10                                                  | 8.660                                | 10.680                        | 8.4                                       |
| 20                                                  | 9.183                                | 10.969                        | 16.3                                      |
| 30                                                  | 9.792                                | 11.149                        | 23.7                                      |
| 40                                                  | 10.502                               | 11.273                        | 27.1                                      |
| 50                                                  | 10.879                               | 11.350                        | 25.9                                      |
| 60                                                  | 11.069                               | 11.441                        | 27.9                                      |
| 70                                                  | 11.200                               | 11.511                        | 29.1                                      |
| 80                                                  | 11.318                               | 11.570                        | 27.8                                      |
| 90                                                  | 11.402                               | 11.606                        | 26.4                                      |
| 100                                                 | 11.462                               | 11.655                        | 28.6                                      |

Tab. S9 pH measurements of 1mg/mL aqueous solution (2 mL) of  $\{\text{Dy}_4\text{Nb}_{28}\}$  and water (2 mL) containing the same amount of KOH.

| Molar ratio<br>KOH: $\{\text{Dy}_4\text{Nb}_{28}\}$ | pH of POM solution<br>containing KOH | pH of water<br>containing KOH | Number of protons<br>released per cluster |
|-----------------------------------------------------|--------------------------------------|-------------------------------|-------------------------------------------|
| 10                                                  | 8.862                                | 10.587                        | 7.3                                       |
| 20                                                  | 9.460                                | 10.905                        | 14.7                                      |
| 30                                                  | 10.035                               | 11.073                        | 20.7                                      |
| 40                                                  | 10.500                               | 11.206                        | 25.0                                      |
| 50                                                  | 10.848                               | 11.292                        | 24.4                                      |
| 60                                                  | 11.037                               | 11.413                        | 27.6                                      |
| 70                                                  | 11.155                               | 11.461                        | 27.3                                      |
| 80                                                  | 11.269                               | 11.514                        | 26.5                                      |
| 90                                                  | 11.347                               | 11.559                        | 27.0                                      |
| 100                                                 | 11.420                               | 11.611                        | 27.5                                      |

Tab. S10 pH measurements of 1mg/mL aqueous solution (2 mL) of  $\{\text{Er}_4\text{Nb}_{28}\}$  and water (2 mL) containing the same amount of KOH.

| Molar ratio<br>KOH: $\{\text{Er}_4\text{Nb}_{28}\}$ | pH of POM solution<br>containing KOH | pH of water<br>containing KOH | Number of protons<br>released per cluster |
|-----------------------------------------------------|--------------------------------------|-------------------------------|-------------------------------------------|
| 10                                                  | 8.584                                | 10.686                        | 9.1                                       |
| 20                                                  | 9.113                                | 10.958                        | 16.9                                      |
| 30                                                  | 9.888                                | 11.144                        | 24.6                                      |
| 40                                                  | 10.544                               | 11.271                        | 28.2                                      |
| 50                                                  | 10.857                               | 11.364                        | 29.6                                      |
| 60                                                  | 11.040                               | 11.435                        | 31.0                                      |
| 70                                                  | 11.181                               | 11.525                        | 33.9                                      |
| 80                                                  | 11.283                               | 11.592                        | 36.6                                      |

|     |        |        |      |
|-----|--------|--------|------|
| 90  | 11.381 | 11.634 | 35.7 |
| 100 | 11.469 | 11.676 | 34.0 |

Tab. S11 pH measurements of 1mg/mL aqueous solution (2 mL) of  $\{\text{Tm}_4\text{Nb}_{28}\}$  and water (2 mL) containing the same amount of KOH.

| Molar ratio<br>KOH: $\{\text{Tm}_4\text{Nb}_{28}\}$ | pH of POM solution<br>containing KOH | pH of water<br>containing KOH | Number of protons<br>released per cluster |
|-----------------------------------------------------|--------------------------------------|-------------------------------|-------------------------------------------|
| 10                                                  | 8.883                                | 10.780                        | 8.9                                       |
| 20                                                  | 9.241                                | 11.062                        | 16.8                                      |
| 30                                                  | 9.848                                | 11.279                        | 27.4                                      |
| 40                                                  | 10.553                               | 11.374                        | 30.3                                      |
| 50                                                  | 10.924                               | 11.465                        | 31.2                                      |
| 60                                                  | 11.139                               | 11.544                        | 32.0                                      |
| 70                                                  | 11.294                               | 11.613                        | 31.9                                      |
| 80                                                  | 11.387                               | 11.664                        | 32.8                                      |
| 90                                                  | 11.477                               | 11.716                        | 33.5                                      |
| 100                                                 | 11.546                               | 11.739                        | 29.0                                      |

Tab. S12 pH measurements of 1mg/mL aqueous solution (2 mL) of  $\{\text{Yb}_4\text{Nb}_{28}\}$  and water (2 mL) containing the same amount of KOH.

| Molar ratio<br>KOH: $\{\text{Yb}_4\text{Nb}_{28}\}$ | pH of POM solution<br>containing KOH | pH of water<br>containing KOH | Number of protons<br>released per cluster |
|-----------------------------------------------------|--------------------------------------|-------------------------------|-------------------------------------------|
| 10                                                  | 8.832                                | 10.620                        | 6.6                                       |
| 20                                                  | 9.457                                | 11.033                        | 18.3                                      |
| 30                                                  | 9.942                                | 11.168                        | 26.1                                      |
| 40                                                  | 10.571                               | 11.303                        | 28.6                                      |
| 50                                                  | 10.927                               | 11.414                        | 30.9                                      |
| 60                                                  | 11.123                               | 11.472                        | 30.5                                      |
| 70                                                  | 11.251                               | 11.550                        | 30.7                                      |
| 80                                                  | 11.362                               | 11.611                        | 32.6                                      |
| 90                                                  | 11.441                               | 11.667                        | 34.7                                      |
| 100                                                 | 11.499                               | 11.715                        | 37.2                                      |

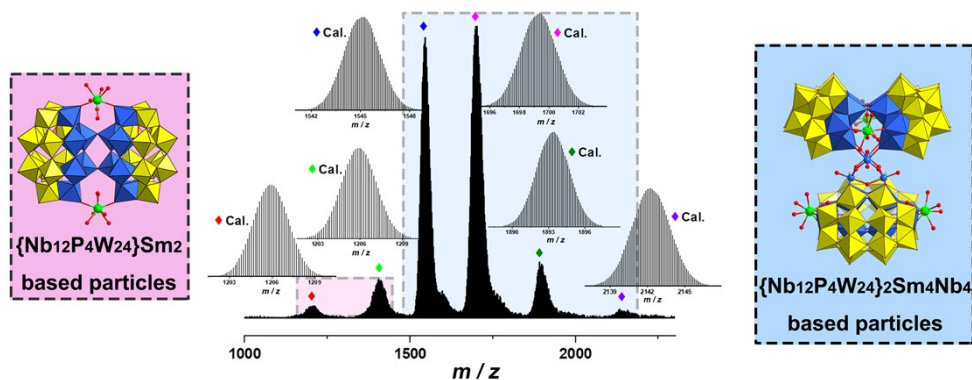

Fig. S5. The negative-ion ESI mass spectra of  $\{\text{Sm}_4\text{Nb}_{28}\}$ . The detection of  $\{\text{Nb}_{12}\text{P}_4\text{W}_{24}\}\text{Sm}_2$  was due to ionization during measurements.

Tab. S13 Experimental and calculated  $m/z$  value of the isotopic envelopes for  $\{\text{Sm}_4\text{Nb}_{28}\}$ .

| Peak assignment                                                                                                                                                                | exp. $m/z$ | cal. $m/z$ |
|--------------------------------------------------------------------------------------------------------------------------------------------------------------------------------|------------|------------|
| ◆ $\{\text{K}_5(\text{NH}_4)_2\{\text{Nb}_{12}\text{P}_4\text{W}_{24}\text{O}_{122}\}\{\text{Sm}(\text{H}_2\text{O})_5\}_2(\text{H}_2\text{O})_7\}^{7-}$                       | 1205.47    | 1205.92    |
| ◆ $\{\text{K}_7(\text{NH}_4)\{\text{Nb}_{12}\text{P}_4\text{W}_{24}\text{O}_{122}\}\{\text{Sm}(\text{H}_2\text{O})_5\}_2(\text{H}_2\text{O})_3\}^{6-}$                         | 1404.56    | 1404.92    |
| ◆ $\{\text{K}_6(\text{NH}_4)_3(\text{Nb}_{12}\text{P}_4\text{W}_{24}\text{O}_{122})_2\text{Sm}_4(\text{H}_2\text{O})_{20}\text{Nb}_4\text{O}_4(\text{OH})_6\text{H}_2\}^{11-}$ | 1544.95    | 1545.07    |
| ◆ $\{\text{K}_5(\text{NH}_4)_5(\text{Nb}_{12}\text{P}_4\text{W}_{24}\text{O}_{122})_2\text{Sm}_4(\text{H}_2\text{O})_{20}\text{Nb}_4\text{O}_4(\text{OH})_6\text{H}_2\}^{10-}$ | 1699.54    | 1699.28    |
| ◆ $\{\text{K}_8(\text{NH}_4)(\text{Nb}_{12}\text{P}_4\text{W}_{24}\text{O}_{122})_2\text{Sm}_4(\text{H}_2\text{O})_{20}\text{Nb}_4\text{O}_4(\text{OH})_6\text{H}_4\}^{9-}$    | 1893.63    | 1893.33    |
| ◆ $\{\text{K}_{11}(\text{Nb}_{12}\text{P}_4\text{W}_{24}\text{O}_{122})_2\text{Sm}_4(\text{H}_2\text{O})_{20}\text{Nb}_4\text{O}_4(\text{OH})_6\text{H}_3\}^{8-}$              | 2142.03    | 2142.28    |

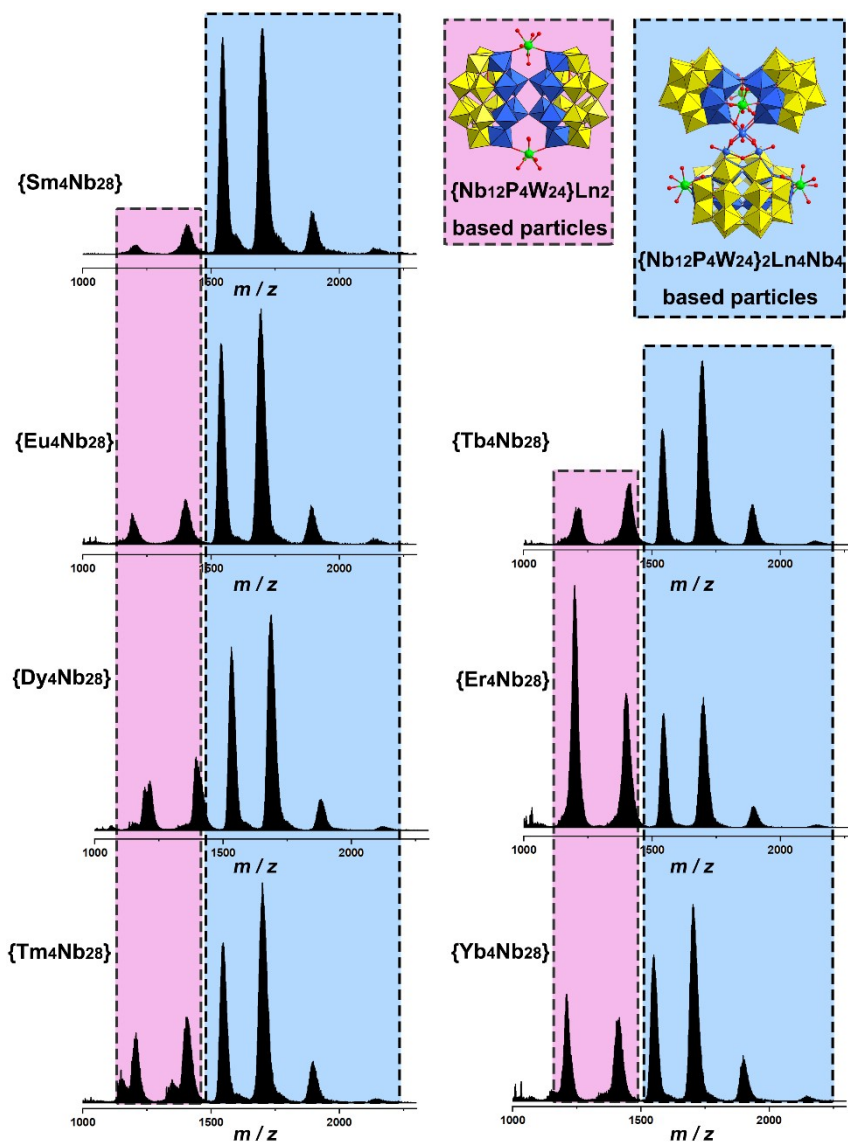

Fig. S6. The negative-ion ESI mass spectra of compounds used in this paper. The detection of  $\{\text{Nb}_{12}\text{P}_4\text{W}_{24}\}\text{Ln}_2$  was due to ionization during measurements.

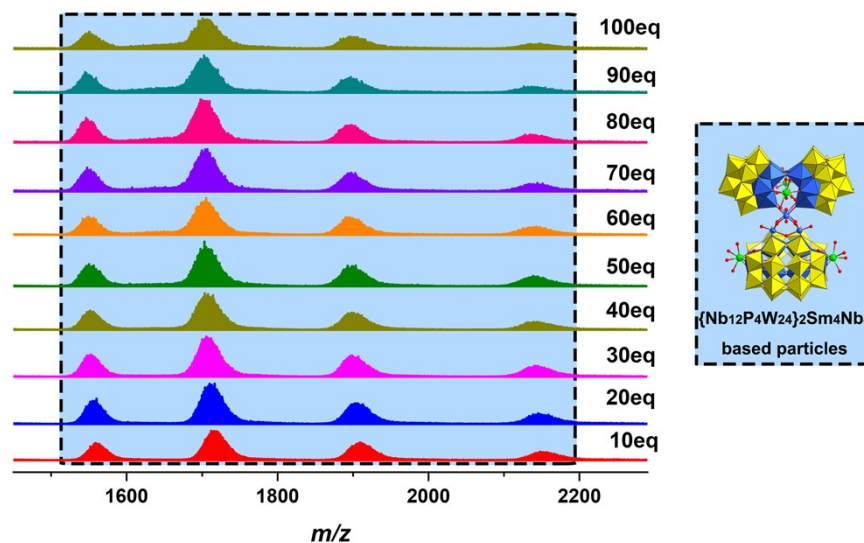

Fig. S7. The negative-ion ESI mass spectra of  $\{\text{Sm}_4\text{Nb}_{28}\}$  used in this paper after the addition of different amounts of KOH (10, 20, 30,  $\dots$  100 equivalents, respectively). Polyanion  $\{\text{Sm}_4\text{Nb}_{28}\}$  can be detected during all the titration process.

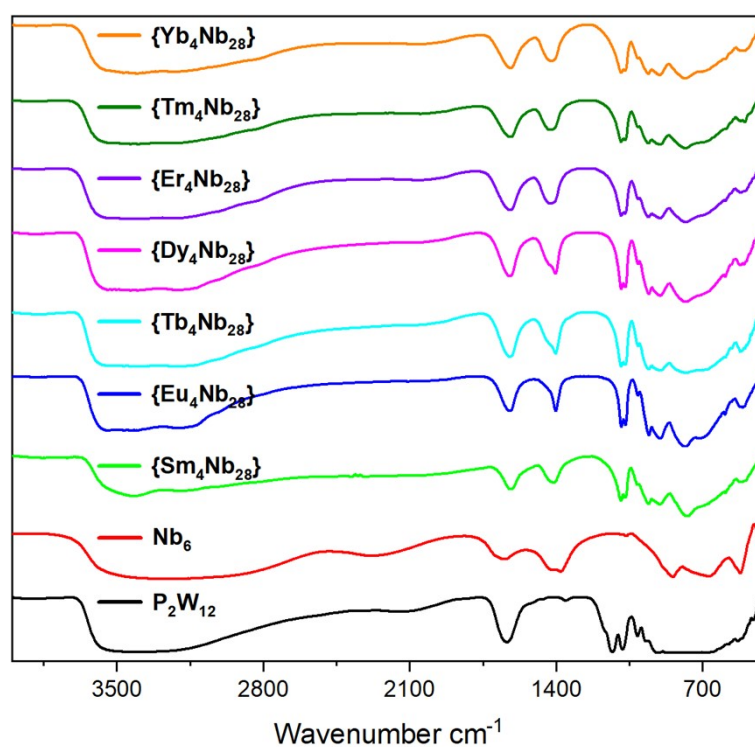

Fig. S8. The IR spectra of compounds **1-7**,  $\text{K}_7[\text{HNb}_6\text{O}_{19}] \cdot 13\text{H}_2\text{O}$  ( $\text{Nb}_6$ ) and  $\text{K}_{12}[\text{H}_2\text{P}_2\text{W}_{12}\text{O}_{48}] \cdot 24\text{H}_2\text{O}$  ( $\text{P}_2\text{W}_{12}$ ) in the region between 4000 to 400  $\text{cm}^{-1}$ .

The Fourier transform infrared spectrum of compounds **1-7** shows medium or strong bands in the range of 1200-550  $\text{cm}^{-1}$ , associated with the antisymmetric stretching vibrations of  $\text{P}\cdots\text{O}$ ,  $\text{P}\cdots\text{O}\cdots\text{W}$ ,  $\text{Nb}\cdots\text{O}\cdots\text{W}$ ,  $\text{W}\cdots\text{O}\cdots\text{W}$  bridges and the terminal  $\text{W}=\text{O}$ ,  $\text{Nb}=\text{O}$  bonds, respectively. These results confirm with the fragment in **1-7**.



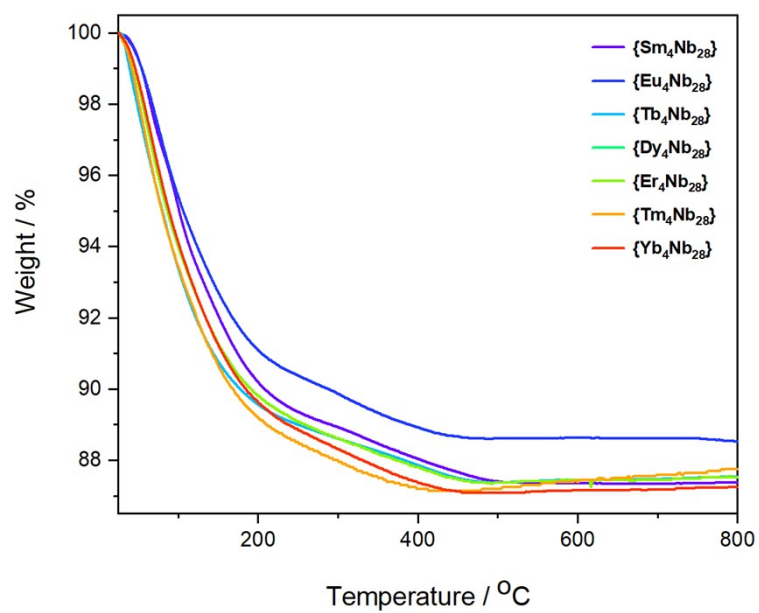

Fig. S9. TG curve of compounds 1-7 under N<sub>2</sub> atmosphere.
